# Supplementary material
Source: Elsevier journal article supplement (https://comptes-rendus.academie-sciences.fr/chimie/article/10.1016/j.crci.2012.11.011/file/attach/mmc1.pdf)
Supplement: mmc1 [file mmc1.pdf]

## Complex 1

data\_1

```
_audit_creation_method      SHELXL-97
_chemical_name_systematic
;
?
;
_chemical_name_common       ?
_chemical_melting_point     ?
_chemical_formula_moiety    ?
_chemical_formula_sum
'C22 H20 Cu N6 O10'
_chemical_formula_weight    591.98
```

loop\_

```
_atom_type_symbol
_atom_type_description
_atom_type_scatter_real
_atom_type_scatter_imag
_atom_type_scatter_source
'C' 'C'  0.0033  0.0016
'International Tables Vol C Tables 4.2.6.8 and 6.1.1.4'
'H' 'H'  0.0000  0.0000
'International Tables Vol C Tables 4.2.6.8 and 6.1.1.4'
'Cu' 'Cu'  0.3201  1.2651
'International Tables Vol C Tables 4.2.6.8 and 6.1.1.4'
'N' 'N'  0.0061  0.0033
'International Tables Vol C Tables 4.2.6.8 and 6.1.1.4'
'O' 'O'  0.0106  0.0060
'International Tables Vol C Tables 4.2.6.8 and 6.1.1.4'
```

```
_symmetry_cell_setting      triclinic
_symmetry_space_group_name_H-M  P-1
```

loop\_

```
_symmetry_equiv_pos_as_xyz
'x, y, z'
'-x, -y, -z'
```

```
_cell_length_a              6.9911(4)
_cell_length_b              8.9006(4)
_cell_length_c              10.3196(5)
_cell_angle_alpha           86.613(4)
```

|                                 |                          |
|---------------------------------|--------------------------|
| _cell_angle_beta                | 71.990(4)                |
| _cell_angle_gamma               | 76.660(4)                |
| _cell_volume                    | 594.14(5)                |
| _cell_formula_units_Z           | 1                        |
| _cell_measurement_temperature   | 293(2)                   |
| _cell_measurement_reflns_used   | ?                        |
| _cell_measurement_theta_min     | ?                        |
| _cell_measurement_theta_max     | ?                        |
|                                 |                          |
| _exptl_crystal_description      | block                    |
| _exptl_crystal_colour           | green                    |
| _exptl_crystal_size_max         | 0.18                     |
| _exptl_crystal_size_mid         | 0.15                     |
| _exptl_crystal_size_min         | 0.12                     |
| _exptl_crystal_density_meas     | ?                        |
| _exptl_crystal_density_diffn    | 1.654                    |
| _exptl_crystal_density_method   | 'not measured'           |
| _exptl_crystal_F_000            | 303                      |
| _exptl_absorpt_coefficient_mu   | 0.991                    |
| _exptl_absorpt_correction_type  | ?                        |
| _exptl_absorpt_correction_T_min | 0.8418                   |
| _exptl_absorpt_correction_T_max | 0.8903                   |
| _exptl_absorpt_process_details  | ?                        |
|                                 |                          |
| _exptl_special_details          |                          |
| ;                               |                          |
| ?                               |                          |
| ;                               |                          |
|                                 |                          |
| _diffn_ambient_temperature      | 293(2)                   |
| _diffn_radiation_wavelength     | 0.71073                  |
| _diffn_radiation_type           | MoK\alpha                |
| _diffn_radiation_source         | 'fine-focus sealed tube' |
| _diffn_radiation_monochromator  | graphite                 |
| _diffn_measurement_device_type  | ?                        |
| _diffn_measurement_method       | ?                        |
| _diffn_detector_area_resol_mean | ?                        |
| _diffn_standards_number         | ?                        |
| _diffn_standards_interval_count | ?                        |
| _diffn_standards_interval_time  | ?                        |
| _diffn_standards_decay_%        | ?                        |
| _diffn_reflns_number            | 3742                     |
| _diffn_reflns_av_R_equivalents  | 0.0263                   |
| _diffn_reflns_av_sigmaI/netI    | 0.0441                   |

```

_diffrn_reflns_limit_h_min      -8
_diffrn_reflns_limit_h_max      8
_diffrn_reflns_limit_k_min      -10
_diffrn_reflns_limit_k_max      9
_diffrn_reflns_limit_l_min      -12
_diffrn_reflns_limit_l_max      12
_diffrn_reflns_theta_min        3.12
_diffrn_reflns_theta_max        25.49
_reflns_number_total            2203
_reflns_number_gt               1994
_reflns_threshold_expression     >2sigma(I)

_computing_data_collection      ?
_computing_cell_refinement      ?
_computing_data_reduction       ?
_computing_structure_solution   'SHELXS-97 (Sheldrick, 1990)'
_computing_structure_refinement 'SHELXL-97 (Sheldrick, 1997)'
_computing_molecular_graphics   ?
_computing_publication_material ?

```

```
_refine_special_details
```

```
;
```

Refinement of  $F^2$  against ALL reflections. The weighted R-factor wR and goodness of fit S are based on  $F^2$ , conventional R-factors R are based on F, with F set to zero for negative  $F^2$ . The threshold expression of  $F^2 > 2\sigma(F^2)$  is used only for calculating R-factors(gt) etc. and is not relevant to the choice of reflections for refinement. R-factors based on  $F^2$  are statistically about twice as large as those based on F, and R-factors based on ALL data will be even larger.

```
;
```

```

_refine_ls_structure_factor_coef  Fsqd
_refine_ls_matrix_type           full
_refine_ls_weighting_scheme      calc
_refine_ls_weighting_details
'calc w=1/[\s^2^(Fo^2)+(0.0497P)^2+0.2932P] where P=(Fo^2+2Fc^2)/3'
_atom_sites_solution_primary     direct
_atom_sites_solution_secondary   difmap
_atom_sites_solution_hydrogens   geom
_refine_ls_hydrogen_treatment    mixed
_refine_ls_extinction_method     none
_refine_ls_extinction_coef       ?
_refine_ls_number_reflns        2203
_refine_ls_number_parameters     182

```

|                                |        |
|--------------------------------|--------|
| _refine_ls_number_restraints   | 0      |
| _refine_ls_R_factor_all        | 0.0438 |
| _refine_ls_R_factor_gt         | 0.0387 |
| _refine_ls_wR_factor_ref       | 0.1021 |
| _refine_ls_wR_factor_gt        | 0.0986 |
| _refine_ls_goodness_of_fit_ref | 1.057  |
| _refine_ls_restrained_S_all    | 1.057  |
| _refine_ls_shift/su_max        | 0.014  |
| _refine_ls_shift/su_mean       | 0.000  |

loop\_

|                                  |
|----------------------------------|
| _atom_site_label                 |
| _atom_site_type_symbol           |
| _atom_site_fract_x               |
| _atom_site_fract_y               |
| _atom_site_fract_z               |
| _atom_site_U_iso_or_equiv        |
| _atom_site_adp_type              |
| _atom_site_occupancy             |
| _atom_site_symmetry_multiplicity |
| _atom_site_calc_flag             |
| _atom_site_refinement_flags      |
| _atom_site_disorder_assembly     |
| _atom_site_disorder_group        |

|     |    |           |           |              |             |      |   |   |      |     |    |
|-----|----|-----------|-----------|--------------|-------------|------|---|---|------|-----|----|
| Cu1 | Cu | 0.5000    | 0.5000    | 0.0000       | 0.02344(17) | Uani | 1 | 2 | d    | S   | .. |
| N1  | N  | 0.4161(3) | 0.4244(3) | 0.2344(2)    | 0.0244(5)   | Uani | 1 | 1 | d    | ... |    |
| N2  | N  | 0.3001(4) | 0.2672(3) | 0.4736(2)    | 0.0290(6)   | Uani | 1 | 1 | d    | ... |    |
| N3  | N  | 0.7999(3) | 0.5007(3) | -0.0009(2)   | 0.0258(5)   | Uani | 1 | 1 | d    | ... |    |
| O1  | O  | 0.6435(4) | 0.0575(2) | 0.0913(2)    | 0.0426(6)   | Uani | 1 | 1 | d    | ... |    |
| O2  | O  | 0.5706(3) | 0.2783(2) | -0.00974(18) | 0.0252(4)   | Uani | 1 | 1 | d    | ... |    |
| O3  | O  | 0.3802(4) | 0.0451(2) | 0.3542(2)    | 0.0444(6)   | Uani | 1 | 1 | d    | ... |    |
| O4  | O  | 0.1742(4) | 0.1275(3) | 0.7204(2)    | 0.0464(6)   | Uani | 1 | 1 | d    | ... |    |
| H1W | H  | 0.1785    | 0.2178    | 0.7383       | 0.74(17)    | Uiso | 1 | 1 | d    | R   | .. |
| H2W | H  | 0.2851    | 0.0714    | 0.7300       | 0.067(14)   | Uiso | 1 | 1 | d    | R   | .. |
| O5  | O  | 0.1367(4) | 0.0364(3) | 0.1808(2)    | 0.0535(7)   | Uani | 1 | 1 | d    | ... |    |
| H4W | H  | 0.1994    | 0.0105    | 0.0980       | 0.059(12)   | Uiso | 1 | 1 | d    | R   | .. |
| H3W | H  | 0.0763    | -0.0361   | 0.1878       | 0.34(7)     | Uiso | 1 | 1 | d    | R   | .. |
| C1  | C  | 0.5609(4) | 0.1944(3) | 0.0956(3)    | 0.0251(6)   | Uani | 1 | 1 | d    | ... |    |
| C2  | C  | 0.4461(4) | 0.2751(3) | 0.2325(3)    | 0.0251(6)   | Uani | 1 | 1 | d    | ... |    |
| C3  | C  | 0.3764(4) | 0.1835(3) | 0.3556(3)    | 0.0287(6)   | Uani | 1 | 1 | d    | ... |    |
| C4  | C  | 0.3281(4) | 0.5046(3) | 0.3571(3)    | 0.0257(6)   | Uani | 1 | 1 | d    | ... |    |
| C5  | C  | 0.2733(4) | 0.4246(3) | 0.4791(3)    | 0.0256(6)   | Uani | 1 | 1 | d    | ... |    |
| C6  | C  | 0.1896(5) | 0.5067(4) | 0.6037(3)    | 0.0337(7)   | Uani | 1 | 1 | d    | ... |    |
| H6  | H  | 0.1537    | 0.4545    | 0.6853       | 0.040       | Uiso | 1 | 1 | calc | R   | .. |

C7 C 0.1618(5) 0.6632(4) 0.6037(3) 0.0365(7) Uani 1 1 d . . .  
H7 H 0.1056 0.7175 0.6861 0.044 Uiso 1 1 calc R . .  
C8 C 0.2156(5) 0.7438(4) 0.4828(3) 0.0367(7) Uani 1 1 d . . .  
H8 H 0.1964 0.8506 0.4850 0.044 Uiso 1 1 calc R . .  
C9 C 0.2968(5) 0.6656(3) 0.3611(3) 0.0330(7) Uani 1 1 d . . .  
H9 H 0.3314 0.7196 0.2804 0.040 Uiso 1 1 calc R . .  
C10 C 0.9540(5) 0.3756(4) -0.0357(3) 0.0337(7) Uani 1 1 d . . .  
H10 H 0.9271 0.2857 -0.0606 0.040 Uiso 1 1 calc R . .  
C11 C 0.8488(5) 0.6250(4) 0.0359(3) 0.0335(7) Uani 1 1 d . . .  
H11 H 0.7464 0.7146 0.0624 0.040 Uiso 1 1 calc R . .

loop\_

\_atom\_site\_aniso\_label  
\_atom\_site\_aniso\_U\_11  
\_atom\_site\_aniso\_U\_22  
\_atom\_site\_aniso\_U\_33  
\_atom\_site\_aniso\_U\_23  
\_atom\_site\_aniso\_U\_13  
\_atom\_site\_aniso\_U\_12

Cu1 0.0216(3) 0.0240(3) 0.0252(3) 0.00362(18) -0.0074(2) -0.00666(19)  
N1 0.0252(12) 0.0238(12) 0.0239(12) 0.0037(9) -0.0061(10) -0.0073(9)  
N2 0.0338(14) 0.0279(13) 0.0244(12) 0.0038(10) -0.0065(11) -0.0091(11)  
N3 0.0247(12) 0.0282(13) 0.0246(12) 0.0029(9) -0.0064(10) -0.0079(10)  
O1 0.0600(15) 0.0275(12) 0.0305(12) 0.0005(9) -0.0091(11) 0.0031(10)  
O2 0.0273(10) 0.0269(10) 0.0218(10) 0.0033(8) -0.0078(8) -0.0070(8)  
O3 0.0691(16) 0.0267(12) 0.0359(12) 0.0064(9) -0.0090(12) -0.0189(11)  
O4 0.0509(15) 0.0430(14) 0.0382(13) 0.0125(10) -0.0122(11) -0.0016(11)  
O5 0.0562(16) 0.0523(15) 0.0418(15) -0.0134(11) 0.0008(12) -0.0102(12)  
C1 0.0245(14) 0.0244(15) 0.0285(15) 0.0029(11) -0.0100(12) -0.0076(11)  
C2 0.0259(14) 0.0272(15) 0.0239(14) 0.0044(11) -0.0094(12) -0.0078(11)  
C3 0.0347(16) 0.0273(16) 0.0257(15) 0.0066(12) -0.0094(13) -0.0115(12)  
C4 0.0237(14) 0.0291(15) 0.0248(14) 0.0025(11) -0.0077(12) -0.0067(11)  
C5 0.0246(14) 0.0275(15) 0.0242(14) 0.0026(11) -0.0070(12) -0.0063(11)  
C6 0.0360(17) 0.0398(18) 0.0240(15) 0.0018(12) -0.0064(13) -0.0101(14)  
C7 0.0389(18) 0.0400(18) 0.0286(16) -0.0061(13) -0.0076(14) -0.0067(14)  
C8 0.0372(17) 0.0261(16) 0.0438(18) -0.0038(13) -0.0085(15) -0.0053(13)  
C9 0.0346(16) 0.0273(16) 0.0337(16) 0.0059(12) -0.0056(14) -0.0081(13)  
C10 0.0297(16) 0.0327(17) 0.0389(17) -0.0061(13) -0.0079(14) -0.0093(13)  
C11 0.0269(15) 0.0333(17) 0.0384(17) -0.0048(13) -0.0099(14) -0.0019(12)

\_geom\_special\_details

;

All esds (except the esd in the dihedral angle between two l.s. planes)  
are estimated using the full covariance matrix. The cell esds are taken

into account individually in the estimation of esds in distances, angles and torsion angles; correlations between esds in cell parameters are only used when they are defined by crystal symmetry. An approximate (isotropic) treatment of cell esds is used for estimating esds involving l.s. planes.

;

loop\_

\_geom\_bond\_atom\_site\_label\_1

\_geom\_bond\_atom\_site\_label\_2

\_geom\_bond\_distance

\_geom\_bond\_site\_symmetry\_2

\_geom\_bond\_publ\_flag

Cu1 O2 1.9214(18) 2\_665 ?

Cu1 O2 1.9214(18) . ?

Cu1 N3 2.095(2) 2\_665 ?

Cu1 N3 2.095(2) . ?

Cu1 N1 2.400(2) . ?

Cu1 N1 2.400(2) 2\_665 ?

N1 C2 1.296(3) . ?

N1 C4 1.383(3) . ?

N2 C3 1.358(4) . ?

N2 C5 1.372(4) . ?

N3 C10 1.336(4) . ?

N3 C11 1.338(4) . ?

O1 C1 1.219(3) . ?

O2 C1 1.275(3) . ?

O3 C3 1.226(3) . ?

O4 H1W 0.8445 . ?

O4 H2W 0.8499 . ?

O5 H4W 0.8490 . ?

O5 H3W 0.8376 . ?

C1 C2 1.520(4) . ?

C2 C3 1.482(4) . ?

C4 C5 1.400(4) . ?

C4 C9 1.400(4) . ?

C5 C6 1.406(4) . ?

C6 C7 1.362(4) . ?

C6 H6 0.9300 . ?

C7 C8 1.393(4) . ?

C7 H7 0.9300 . ?

C8 C9 1.366(4) . ?

C8 H8 0.9300 . ?

C9 H9 0.9300 . ?

C10 C11 1.377(4) 2\_765 ?

C10 H10 0.9300 . ?  
C11 C10 1.377(4) 2\_765 ?  
C11 H11 0.9300 . ?

loop\_

\_geom\_angle\_atom\_site\_label\_1  
\_geom\_angle\_atom\_site\_label\_2  
\_geom\_angle\_atom\_site\_label\_3  
\_geom\_angle  
\_geom\_angle\_site\_symmetry\_1  
\_geom\_angle\_site\_symmetry\_3  
\_geom\_angle\_publ\_flag  
O2 Cu1 O2 180.0 2\_665 . ?  
O2 Cu1 N3 89.95(8) 2\_665 2\_665 ?  
O2 Cu1 N3 90.05(8) . 2\_665 ?  
O2 Cu1 N3 90.05(8) 2\_665 . ?  
O2 Cu1 N3 89.95(8) . . ?  
N3 Cu1 N3 180.00(12) 2\_665 . ?  
O2 Cu1 N1 103.74(7) 2\_665 . ?  
O2 Cu1 N1 76.26(7) . . ?  
N3 Cu1 N1 89.86(8) 2\_665 . ?  
N3 Cu1 N1 90.14(8) . . ?  
O2 Cu1 N1 76.26(7) 2\_665 2\_665 ?  
O2 Cu1 N1 103.74(7) . 2\_665 ?  
N3 Cu1 N1 90.14(8) 2\_665 2\_665 ?  
N3 Cu1 N1 89.86(8) . 2\_665 ?  
N1 Cu1 N1 180.00(10) . 2\_665 ?  
C2 N1 C4 119.9(2) . . ?  
C2 N1 Cu1 105.69(17) . . ?  
C4 N1 Cu1 133.94(18) . . ?  
C3 N2 C5 123.6(2) . . ?  
C10 N3 C11 115.6(2) . . ?  
C10 N3 Cu1 122.0(2) . . ?  
C11 N3 Cu1 122.38(19) . . ?  
C1 O2 Cu1 122.67(17) . . ?  
H1W O4 H2W 104.1 . . ?  
H4W O5 H3W 89.0 . . ?  
O1 C1 O2 123.6(3) . . ?  
O1 C1 C2 119.8(2) . . ?  
O2 C1 C2 116.5(2) . . ?  
N1 C2 C3 123.2(2) . . ?  
N1 C2 C1 116.7(2) . . ?  
C3 C2 C1 120.0(2) . . ?  
O3 C3 N2 121.5(2) . . ?

O3 C3 C2 124.4(3) . . ?  
N2 C3 C2 114.0(2) . . ?  
N1 C4 C5 120.1(3) . . ?  
N1 C4 C9 120.6(2) . . ?  
C5 C4 C9 119.3(3) . . ?  
N2 C5 C4 118.8(2) . . ?  
N2 C5 C6 121.6(2) . . ?  
C4 C5 C6 119.7(3) . . ?  
C7 C6 C5 119.4(3) . . ?  
C7 C6 H6 120.3 . . ?  
C5 C6 H6 120.3 . . ?  
C6 C7 C8 121.3(3) . . ?  
C6 C7 H7 119.3 . . ?  
C8 C7 H7 119.3 . . ?  
C9 C8 C7 119.9(3) . . ?  
C9 C8 H8 120.1 . . ?  
C7 C8 H8 120.1 . . ?  
C8 C9 C4 120.4(3) . . ?  
C8 C9 H9 119.8 . . ?  
C4 C9 H9 119.8 . . ?  
N3 C10 C11 122.3(3) . 2\_765 ?  
N3 C10 H10 118.8 . . ?  
C11 C10 H10 118.8 2\_765 . ?  
N3 C11 C10 122.1(3) . 2\_765 ?  
N3 C11 H11 119.0 . . ?  
C10 C11 H11 119.0 2\_765 . ?

loop\_

\_geom\_torsion\_atom\_site\_label\_1  
\_geom\_torsion\_atom\_site\_label\_2  
\_geom\_torsion\_atom\_site\_label\_3  
\_geom\_torsion\_atom\_site\_label\_4  
\_geom\_torsion

\_geom\_torsion\_site\_symmetry\_1  
\_geom\_torsion\_site\_symmetry\_2  
\_geom\_torsion\_site\_symmetry\_3  
\_geom\_torsion\_site\_symmetry\_4  
\_geom\_torsion\_publ\_flag

O2 Cu1 N1 C2 175.03(17) 2\_665 . . . ?  
O2 Cu1 N1 C2 -4.97(17) . . . . ?  
N3 Cu1 N1 C2 85.11(18) 2\_665 . . . ?  
N3 Cu1 N1 C2 -94.89(18) . . . . ?  
N1 Cu1 N1 C2 -57(100) 2\_665 . . . ?  
O2 Cu1 N1 C4 3.4(3) 2\_665 . . . ?



O2 Cu1 N1 C4 -176.6(3) . . . . ?  
N3 Cu1 N1 C4 -86.6(3) 2\_665 . . . ?  
N3 Cu1 N1 C4 93.4(3) . . . . ?  
N1 Cu1 N1 C4 131(100) 2\_665 . . . ?  
O2 Cu1 N3 C10 -165.5(2) 2\_665 . . . ?  
O2 Cu1 N3 C10 14.5(2) . . . . ?  
N3 Cu1 N3 C10 -72(6) 2\_665 . . . ?  
N1 Cu1 N3 C10 90.8(2) . . . . ?  
N1 Cu1 N3 C10 -89.2(2) 2\_665 . . . ?  
O2 Cu1 N3 C11 15.9(2) 2\_665 . . . ?  
O2 Cu1 N3 C11 -164.1(2) . . . . ?  
N3 Cu1 N3 C11 110(6) 2\_665 . . . ?  
N1 Cu1 N3 C11 -87.8(2) . . . . ?  
N1 Cu1 N3 C11 92.2(2) 2\_665 . . . ?  
O2 Cu1 O2 C1 -119(100) 2\_665 . . . ?  
N3 Cu1 O2 C1 -94.7(2) 2\_665 . . . ?  
N3 Cu1 O2 C1 85.3(2) . . . . ?  
N1 Cu1 O2 C1 -4.9(2) . . . . ?  
N1 Cu1 O2 C1 175.1(2) 2\_665 . . . ?  
Cu1 O2 C1 O1 -164.2(2) . . . . ?  
Cu1 O2 C1 C2 13.2(3) . . . . ?  
C4 N1 C2 C3 4.7(4) . . . . ?  
Cu1 N1 C2 C3 -168.4(2) . . . . ?  
C4 N1 C2 C1 -174.6(2) . . . . ?  
Cu1 N1 C2 C1 12.3(3) . . . . ?  
O1 C1 C2 N1 159.8(3) . . . . ?  
O2 C1 C2 N1 -17.7(4) . . . . ?  
O1 C1 C2 C3 -19.5(4) . . . . ?  
O2 C1 C2 C3 163.0(2) . . . . ?  
C5 N2 C3 O3 -173.2(3) . . . . ?  
C5 N2 C3 C2 5.0(4) . . . . ?  
N1 C2 C3 O3 170.7(3) . . . . ?  
C1 C2 C3 O3 -10.0(4) . . . . ?  
N1 C2 C3 N2 -7.4(4) . . . . ?  
C1 C2 C3 N2 171.9(2) . . . . ?  
C2 N1 C4 C5 0.6(4) . . . . ?  
Cu1 N1 C4 C5 171.37(19) . . . . ?  
C2 N1 C4 C9 179.3(3) . . . . ?  
Cu1 N1 C4 C9 -9.9(4) . . . . ?  
C3 N2 C5 C4 -0.3(4) . . . . ?  
C3 N2 C5 C6 178.7(3) . . . . ?  
N1 C4 C5 N2 -2.9(4) . . . . ?  
C9 C4 C5 N2 178.4(3) . . . . ?  
N1 C4 C5 C6 178.1(3) . . . . ?

C9 C4 C5 C6 -0.6(4) . . . . ?  
N2 C5 C6 C7 -178.5(3) . . . . ?  
C4 C5 C6 C7 0.5(5) . . . . ?  
C5 C6 C7 C8 -0.4(5) . . . . ?  
C6 C7 C8 C9 0.5(5) . . . . ?  
C7 C8 C9 C4 -0.6(5) . . . . ?  
N1 C4 C9 C8 -178.0(3) . . . . ?  
C5 C4 C9 C8 0.7(4) . . . . ?  
C11 N3 C10 C11 -1.0(5) . . . 2\_765 ?  
Cu1 N3 C10 C11 -179.7(2) . . . 2\_765 ?  
C10 N3 C11 C10 1.0(5) . . . 2\_765 ?  
Cu1 N3 C11 C10 179.7(2) . . . 2\_765 ?

\_diffn\_measured\_fraction\_theta\_max 0.999  
\_diffn\_reflns\_theta\_full 25.49  
\_diffn\_measured\_fraction\_theta\_full 0.999  
\_refine\_diff\_density\_max 0.593  
\_refine\_diff\_density\_min -0.282  
\_refine\_diff\_density\_rms 0.068

===end

## Complex 2

data\_2011124b

\_audit\_creation\_method SHELXL-97  
\_chemical\_name\_systematic  
;  
?  
;  
\_chemical\_name\_common ?  
\_chemical\_melting\_point ?  
\_chemical\_formula\_moiety ?  
\_chemical\_formula\_sum  
'C28 H16 Cu N6 O6'  
\_chemical\_formula\_weight 596.01

loop\_

\_atom\_type\_symbol  
\_atom\_type\_description  
\_atom\_type\_scatter\_dispersion\_real  
\_atom\_type\_scatter\_dispersion\_imag

\_atom\_type\_scatter\_source  
 'C' 'C' 0.0033 0.0016  
 'International Tables Vol C Tables 4.2.6.8 and 6.1.1.4'  
 'H' 'H' 0.0000 0.0000  
 'International Tables Vol C Tables 4.2.6.8 and 6.1.1.4'  
 'N' 'N' 0.0061 0.0033  
 'International Tables Vol C Tables 4.2.6.8 and 6.1.1.4'  
 'O' 'O' 0.0106 0.0060  
 'International Tables Vol C Tables 4.2.6.8 and 6.1.1.4'  
 'Cu' 'Cu' 0.3201 1.2651  
 'International Tables Vol C Tables 4.2.6.8 and 6.1.1.4'

\_symmetry\_cell\_setting Orthorhombic  
 \_symmetry\_space\_group\_name\_H-M Fdd2

loop\_

\_symmetry\_equiv\_pos\_as\_xyz

'x, y, z'  
 'x, -y, -z'  
 'x+1/4, y+1/4, -z+1/4'  
 'x+1/4, -y+1/4, z+1/4'  
 'x, y+1/2, z+1/2'  
 'x, -y+1/2, -z+1/2'  
 'x+1/4, y+3/4, -z+3/4'  
 'x+1/4, -y+3/4, z+3/4'  
 'x+1/2, y, z+1/2'  
 'x+1/2, -y, -z+1/2'  
 'x+3/4, y+1/4, -z+3/4'  
 'x+3/4, -y+1/4, z+3/4'  
 'x+1/2, y+1/2, z'  
 'x+1/2, -y+1/2, -z'  
 'x+3/4, y+3/4, -z+1/4'  
 'x+3/4, -y+3/4, z+1/4'

\_cell\_length\_a 11.1387(4)  
 \_cell\_length\_b 12.2921(4)  
 \_cell\_length\_c 35.3173(16)  
 \_cell\_angle\_alpha 90.00  
 \_cell\_angle\_beta 90.00  
 \_cell\_angle\_gamma 90.00  
 \_cell\_volume 4835.6(3)  
 \_cell\_formula\_units\_Z 8  
 \_cell\_measurement\_temperature 293(2)  
 \_cell\_measurement\_reflns\_used ?

|                                 |                          |
|---------------------------------|--------------------------|
| _cell_measurement_theta_min     | ?                        |
| _cell_measurement_theta_max     | ?                        |
|                                 |                          |
| _exptl_crystal_description      | block                    |
| _exptl_crystal_colour           | green                    |
| _exptl_crystal_size_max         | 0.20                     |
| _exptl_crystal_size_mid         | 0.17                     |
| _exptl_crystal_size_min         | 0.15                     |
| _exptl_crystal_density_meas     | ?                        |
| _exptl_crystal_density_diffn    | 1.637                    |
| _exptl_crystal_density_method   | 'not measured'           |
| _exptl_crystal_F_000            | 2424                     |
| _exptl_absorpt_coefficient_mu   | 0.964                    |
| _exptl_absorpt_correction_type  | ?                        |
| _exptl_absorpt_correction_T_min | 0.8306                   |
| _exptl_absorpt_correction_T_max | 0.8689                   |
| _exptl_absorpt_process_details  | ?                        |
|                                 |                          |
| _exptl_special_details          |                          |
| ;                               |                          |
| ?                               |                          |
| ;                               |                          |
|                                 |                          |
| _diffn_ambient_temperature      | 293(2)                   |
| _diffn_radiation_wavelength     | 0.71073                  |
| _diffn_radiation_type           | MoK\alpha                |
| _diffn_radiation_source         | 'fine-focus sealed tube' |
| _diffn_radiation_monochromator  | graphite                 |
| _diffn_measurement_device_type  | ?                        |
| _diffn_measurement_method       | ?                        |
| _diffn_detector_area_resol_mean | ?                        |
| _diffn_standards_number         | ?                        |
| _diffn_standards_interval_count | ?                        |
| _diffn_standards_interval_time  | ?                        |
| _diffn_standards_decay_%        | ?                        |
| _diffn_reflns_number            | 9997                     |
| _diffn_reflns_av_R_equivalents  | 0.0303                   |
| _diffn_reflns_av_sigmaI/netI    | 0.0272                   |
| _diffn_reflns_limit_h_min       | -13                      |
| _diffn_reflns_limit_h_max       | 13                       |
| _diffn_reflns_limit_k_min       | -14                      |
| _diffn_reflns_limit_k_max       | 14                       |
| _diffn_reflns_limit_l_min       | -38                      |
| _diffn_reflns_limit_l_max       | 42                       |

|                                 |                               |
|---------------------------------|-------------------------------|
| _diffn_reflns_theta_min         | 3.01                          |
| _diffn_reflns_theta_max         | 25.48                         |
| _reflns_number_total            | 2201                          |
| _reflns_number_gt               | 2070                          |
| _reflns_threshold_expression    | >2sigma(I)                    |
| _computing_data_collection      | ?                             |
| _computing_cell_refinement      | ?                             |
| _computing_data_reduction       | ?                             |
| _computing_structure_solution   | 'SHELXS-97 (Sheldrick, 1990)' |
| _computing_structure_refinement | 'SHELXL-97 (Sheldrick, 1997)' |
| _computing_molecular_graphics   | ?                             |
| _computing_publication_material | ?                             |

\_refine\_special\_details

;

Refinement of  $F^2$  against ALL reflections. The weighted R-factor wR and goodness of fit S are based on  $F^2$ , conventional R-factors R are based on F, with F set to zero for negative  $F^2$ . The threshold expression of  $F^2 > 2\sigma(F^2)$  is used only for calculating R-factors(gt) etc. and is not relevant to the choice of reflections for refinement. R-factors based on  $F^2$  are statistically about twice as large as those based on F, and R-factors based on ALL data will be even larger.

;

|                                  |                                                                             |
|----------------------------------|-----------------------------------------------------------------------------|
| _refine_ls_structure_factor_coef | Fsqd                                                                        |
| _refine_ls_matrix_type           | full                                                                        |
| _refine_ls_weighting_scheme      | calc                                                                        |
| _refine_ls_weighting_details     | 'calc w=1/[ $s^2(F_o^2)+(0.0308P)^2+4.4631P$ ] where $P=(F_o^2+2F_c^2)/3$ ' |
| _atom_sites_solution_primary     | direct                                                                      |
| _atom_sites_solution_secondary   | difmap                                                                      |
| _atom_sites_solution_hydrogens   | geom                                                                        |
| _refine_ls_hydrogen_treatment    | mixed                                                                       |
| _refine_ls_extinction_method     | none                                                                        |
| _refine_ls_extinction_coef       | ?                                                                           |
| _refine_ls_abs_structure_details | 'Flack H D (1983), Acta Cryst. A39, 876-881'                                |
| _refine_ls_abs_structure_Flack   | 0.000(18)                                                                   |
| _refine_ls_number_reflns         | 2201                                                                        |
| _refine_ls_number_parameters     | 189                                                                         |
| _refine_ls_number_restraints     | 1                                                                           |
| _refine_ls_R_factor_all          | 0.0266                                                                      |
| _refine_ls_R_factor_gt           | 0.0236                                                                      |

|                                |        |
|--------------------------------|--------|
| _refine_ls_wR_factor_ref       | 0.0605 |
| _refine_ls_wR_factor_gt        | 0.0588 |
| _refine_ls_goodness_of_fit_ref | 1.074  |
| _refine_ls_restrained_S_all    | 1.074  |
| _refine_ls_shift/su_max        | 0.022  |
| _refine_ls_shift/su_mean       | 0.003  |

loop\_

|                                  |  |
|----------------------------------|--|
| _atom_site_label                 |  |
| _atom_site_type_symbol           |  |
| _atom_site_fract_x               |  |
| _atom_site_fract_y               |  |
| _atom_site_fract_z               |  |
| _atom_site_U_iso_or_equiv        |  |
| _atom_site_adp_type              |  |
| _atom_site_occupancy             |  |
| _atom_site_symmetry_multiplicity |  |
| _atom_site_calc_flag             |  |
| _atom_site_refinement_flags      |  |
| _atom_site_disorder_assembly     |  |
| _atom_site_disorder_group        |  |

Cu1 Cu 1.16539(4) 0.0000 0.0000 0.01806(11) Uani 1 2 d S . .  
N1 N 1.1599(2) 0.03677(14) 0.06559(5) 0.0213(4) Uani 1 1 d . . .  
N3 N 0.9830(3) 0.0000 0.0000 0.0209(9) Uani 1 2 d S . .  
N4 N 0.3485(3) 0.0000 0.0000 0.0196(9) Uani 1 2 d S . .  
O1 O 1.2044(3) -0.24533(14) 0.07455(7) 0.0407(7) Uani 1 1 d . . .  
O2 O 1.17074(16) -0.14777(12) 0.02302(4) 0.0225(3) Uani 1 1 d . . .  
O3 O 1.1960(2) -0.16145(17) 0.13960(6) 0.0468(6) Uani 1 1 d . . .  
C1 C 1.1850(2) -0.15725(18) 0.05825(7) 0.0236(5) Uani 1 1 d . . .  
C2 C 1.1740(3) -0.05725(19) 0.08267(7) 0.0233(5) Uani 1 1 d . . .  
C3 C 1.1780(3) -0.0647(2) 0.12325(7) 0.0298(6) Uani 1 1 d . . .  
N2 N 1.1619(3) 0.01999(16) 0.14520(6) 0.0325(5) Uani 1 1 d . . .  
C5 C 1.1425(2) 0.1174(2) 0.12756(7) 0.0274(6) Uani 1 1 d . . .  
C6 C 1.1430(2) 0.12692(19) 0.08761(7) 0.0235(5) Uani 1 1 d . . .  
C7 C 1.1220(3) 0.2284(2) 0.07050(10) 0.0314(7) Uani 1 1 d . . .  
H7 H 1.1232 0.2350 0.0443 0.038 Uiso 1 1 calc R . .  
C8 C 1.1000(3) 0.3169(2) 0.09254(9) 0.0404(7) Uani 1 1 d . . .  
H8 H 1.0855 0.3840 0.0813 0.048 Uiso 1 1 calc R . .  
C9 C 1.0991(3) 0.3077(2) 0.13194(10) 0.0447(8) Uani 1 1 d . . .  
H9 H 1.0833 0.3688 0.1466 0.054 Uiso 1 1 calc R . .  
C10 C 1.1209(3) 0.2109(2) 0.14912(9) 0.0389(7) Uani 1 1 d . . .  
H10 H 1.1214 0.2066 0.1754 0.047 Uiso 1 1 calc R . .  
C11 C 0.9194(2) 0.09230(19) 0.00419(6) 0.0228(5) Uani 1 1 d . . .  
H11 H 0.9611 0.1574 0.0069 0.027 Uiso 1 1 calc R . .

C12 C 0.7963(2) 0.0955(2) 0.00470(7) 0.0234(6) Uani 1 1 d . . .  
H12 H 0.7568 0.1614 0.0082 0.028 Uiso 1 1 calc R . .  
C13 C 0.7303(4) 0.0000 0.0000 0.0177(11) Uani 1 2 d S . .  
C14 C 0.5975(4) 0.0000 0.0000 0.0235(12) Uani 1 2 d S . .  
C15 C 0.5332(2) 0.07703(19) 0.02043(8) 0.0248(6) Uani 1 1 d . . .  
H15 H 0.5731 0.1296 0.0346 0.030 Uiso 1 1 calc R . .  
C16 C 0.4099(3) 0.07455(18) 0.01949(7) 0.0251(5) Uani 1 1 d . . .  
H16 H 0.3674 0.1270 0.0330 0.030 Uiso 1 1 calc R . .

loop\_

\_atom\_site\_aniso\_label  
\_atom\_site\_aniso\_U\_11  
\_atom\_site\_aniso\_U\_22  
\_atom\_site\_aniso\_U\_33  
\_atom\_site\_aniso\_U\_23  
\_atom\_site\_aniso\_U\_13  
\_atom\_site\_aniso\_U\_12

Cu1 0.01250(16) 0.02117(17) 0.0205(2) 0.00027(18) 0.000 0.000  
N1 0.0182(9) 0.0239(9) 0.0219(10) -0.0022(7) -0.0010(11) -0.0009(11)  
N3 0.017(2) 0.028(2) 0.019(2) -0.0019(12) 0.000 0.000  
N4 0.012(2) 0.024(2) 0.023(2) -0.0015(12) 0.000 0.000  
O1 0.0622(18) 0.0256(11) 0.0342(14) 0.0027(8) -0.0041(12) 0.0107(8)  
O2 0.0247(8) 0.0223(8) 0.0206(9) -0.0021(6) -0.0010(8) 0.0028(7)  
O3 0.0725(19) 0.0406(11) 0.0273(11) 0.0123(9) -0.0053(11) 0.0087(11)  
C1 0.0190(13) 0.0242(12) 0.0274(14) 0.0020(10) 0.0002(10) 0.0028(10)  
C2 0.0188(12) 0.0288(12) 0.0223(12) 0.0006(10) -0.0005(12) -0.0012(12)  
C3 0.0301(15) 0.0377(14) 0.0214(14) 0.0048(11) -0.0011(12) 0.0011(13)  
N2 0.0358(11) 0.0406(13) 0.0212(10) -0.0025(8) -0.0004(14) 0.0041(13)  
C5 0.0220(15) 0.0370(14) 0.0231(14) -0.0066(11) 0.0017(11) -0.0020(11)  
C6 0.0191(13) 0.0284(12) 0.0229(13) -0.0042(10) 0.0009(10) -0.0015(10)  
C7 0.0366(19) 0.0291(14) 0.0284(17) -0.0015(12) -0.0006(14) 0.0003(13)  
C8 0.0442(19) 0.0291(15) 0.048(2) -0.0073(13) -0.0041(14) 0.0065(12)  
C9 0.0468(19) 0.0391(18) 0.048(2) -0.0197(14) 0.0019(14) 0.0077(14)  
C10 0.0426(17) 0.0488(17) 0.0254(16) -0.0134(13) 0.0025(13) 0.0006(14)  
C11 0.0195(12) 0.0216(12) 0.0273(14) -0.0021(9) -0.0005(13) -0.0031(10)  
C12 0.0205(13) 0.0211(13) 0.0287(15) -0.0035(10) -0.0006(10) 0.0024(9)  
C13 0.019(3) 0.025(2) 0.009(2) -0.0027(13) 0.000 0.000  
C14 0.014(3) 0.027(2) 0.029(3) -0.0012(15) 0.000 0.000  
C15 0.0190(14) 0.0281(13) 0.0272(15) -0.0081(11) -0.0018(11) -0.0019(10)  
C16 0.0214(12) 0.0297(12) 0.0241(14) -0.0078(10) 0.0041(13) 0.0020(12)

\_geom\_special\_details

;

All esds (except the esd in the dihedral angle between two l.s. planes)

are estimated using the full covariance matrix. The cell esds are taken into account individually in the estimation of esds in distances, angles and torsion angles; correlations between esds in cell parameters are only used when they are defined by crystal symmetry. An approximate (isotropic) treatment of cell esds is used for estimating esds involving l.s. planes.

;

```
loop_
  _geom_bond_atom_site_label_1
  _geom_bond_atom_site_label_2
  _geom_bond_distance
  _geom_bond_site_symmetry_2
  _geom_bond_publ_flag
Cu1 O2 1.9909(14) . ?
Cu1 O2 1.9909(14) 2 ?
Cu1 N3 2.031(4) . ?
Cu1 N4 2.040(4) 1_655 ?
Cu1 N1 2.3611(18) 2 ?
Cu1 N1 2.3611(18) . ?
N1 C2 1.313(3) . ?
N1 C6 1.367(3) . ?
N3 C11 1.346(3) 2 ?
N3 C11 1.346(3) . ?
N4 C16 1.334(3) 2 ?
N4 C16 1.334(3) . ?
N4 Cu1 2.040(4) 1_455 ?
O1 C1 1.245(3) . ?
O2 C1 1.260(3) . ?
O3 C3 1.337(3) . ?
C1 C2 1.507(3) . ?
C2 C3 1.437(3) . ?
C3 N2 1.310(3) . ?
N2 C5 1.366(3) . ?
C5 C10 1.400(4) . ?
C5 C6 1.416(3) . ?
C6 C7 1.406(4) . ?
C7 C8 1.360(4) . ?
C7 H7 0.9300 . ?
C8 C9 1.396(4) . ?
C8 H8 0.9300 . ?
C9 C10 1.358(5) . ?
C9 H9 0.9300 . ?
C10 H10 0.9300 . ?
C11 C12 1.371(4) . ?
```



C11 H11 0.9300 . ?  
C12 C13 1.395(3) . ?  
C12 H12 0.9300 . ?  
C13 C12 1.395(3) 2 ?  
C13 C14 1.479(3) . ?  
C14 C15 1.390(3) 2 ?  
C14 C15 1.390(3) . ?  
C15 C16 1.374(4) . ?  
C15 H15 0.9300 . ?  
C16 H16 0.9300 . ?

loop\_

\_geom\_angle\_atom\_site\_label\_1  
\_geom\_angle\_atom\_site\_label\_2  
\_geom\_angle\_atom\_site\_label\_3  
\_geom\_angle  
\_geom\_angle\_site\_symmetry\_1  
\_geom\_angle\_site\_symmetry\_3  
\_geom\_angle\_publ\_flag  
O2 Cu1 O2 176.57(11) . 2 ?  
O2 Cu1 N3 91.71(5) . . ?  
O2 Cu1 N3 91.71(5) 2 . ?  
O2 Cu1 N4 88.29(5) . 1\_655 ?  
O2 Cu1 N4 88.29(5) 2 1\_655 ?  
N3 Cu1 N4 180.0 . 1\_655 ?  
O2 Cu1 N1 103.11(6) . 2 ?  
O2 Cu1 N1 76.98(6) 2 2 ?  
N3 Cu1 N1 88.50(6) . 2 ?  
N4 Cu1 N1 91.50(6) 1\_655 2 ?  
O2 Cu1 N1 76.98(6) . . ?  
O2 Cu1 N1 103.11(6) 2 . ?  
N3 Cu1 N1 88.50(6) . . ?  
N4 Cu1 N1 91.50(6) 1\_655 . ?  
N1 Cu1 N1 177.01(12) 2 . ?  
C2 N1 C6 118.0(2) . . ?  
C2 N1 Cu1 106.20(13) . . ?  
C6 N1 Cu1 135.81(15) . . ?  
C11 N3 C11 116.4(4) 2 . ?  
C11 N3 Cu1 121.79(19) 2 . ?  
C11 N3 Cu1 121.79(19) . . ?  
C16 N4 C16 118.4(4) 2 . ?  
C16 N4 Cu1 120.80(19) 2 1\_455 ?  
C16 N4 Cu1 120.80(19) . 1\_455 ?  
C1 O2 Cu1 119.44(14) . . ?

O1 C1 O2 124.0(2) . . ?  
O1 C1 C2 117.3(2) . . ?  
O2 C1 C2 118.7(2) . . ?  
N1 C2 C3 121.2(2) . . ?  
N1 C2 C1 117.71(19) . . ?  
C3 C2 C1 121.1(2) . . ?  
N2 C3 O3 118.1(2) . . ?  
N2 C3 C2 122.4(2) . . ?  
O3 C3 C2 119.5(2) . . ?  
C3 N2 C5 116.6(2) . . ?  
N2 C5 C10 119.9(2) . . ?  
N2 C5 C6 121.8(2) . . ?  
C10 C5 C6 118.3(3) . . ?  
N1 C6 C7 119.8(2) . . ?  
N1 C6 C5 120.0(2) . . ?  
C7 C6 C5 120.1(2) . . ?  
C8 C7 C6 119.6(3) . . ?  
C8 C7 H7 120.2 . . ?  
C6 C7 H7 120.2 . . ?  
C7 C8 C9 120.5(3) . . ?  
C7 C8 H8 119.8 . . ?  
C9 C8 H8 119.8 . . ?  
C10 C9 C8 121.0(3) . . ?  
C10 C9 H9 119.5 . . ?  
C8 C9 H9 119.5 . . ?  
C9 C10 C5 120.5(3) . . ?  
C9 C10 H10 119.7 . . ?  
C5 C10 H10 119.7 . . ?  
N3 C11 C12 123.5(3) . . ?  
N3 C11 H11 118.2 . . ?  
C12 C11 H11 118.2 . . ?  
C11 C12 C13 120.1(3) . . ?  
C11 C12 H12 120.0 . . ?  
C13 C12 H12 120.0 . . ?  
C12 C13 C12 116.4(4) 2 . ?  
C12 C13 C14 121.80(19) 2 . ?  
C12 C13 C14 121.80(19) . . ?  
C15 C14 C15 117.9(4) 2 . ?  
C15 C14 C13 121.06(18) 2 . ?  
C15 C14 C13 121.06(18) . . ?  
C16 C15 C14 119.2(2) . . ?  
C16 C15 H15 120.4 . . ?  
C14 C15 H15 120.4 . . ?  
N4 C16 C15 122.6(3) . . ?

N4 C16 H16 118.7 . . ?  
C15 C16 H16 118.7 . . ?

loop\_

\_geom\_torsion\_atom\_site\_label\_1  
\_geom\_torsion\_atom\_site\_label\_2  
\_geom\_torsion\_atom\_site\_label\_3  
\_geom\_torsion\_atom\_site\_label\_4

\_geom\_torsion

\_geom\_torsion\_site\_symmetry\_1

\_geom\_torsion\_site\_symmetry\_2

\_geom\_torsion\_site\_symmetry\_3

\_geom\_torsion\_site\_symmetry\_4

\_geom\_torsion\_publ\_flag

O2 Cu1 N1 C2 5.49(16) . . . . ?  
O2 Cu1 N1 C2 -170.99(16) 2 . . . ?  
N3 Cu1 N1 C2 97.59(16) . . . . ?  
N4 Cu1 N1 C2 -82.41(16) 1\_655 . . . ?  
N1 Cu1 N1 C2 97.59(16) 2 . . . ?  
O2 Cu1 N1 C6 -172.3(3) . . . . ?  
O2 Cu1 N1 C6 11.3(3) 2 . . . ?  
N3 Cu1 N1 C6 -80.2(3) . . . . ?  
N4 Cu1 N1 C6 99.8(3) 1\_655 . . . ?  
N1 Cu1 N1 C6 -80.2(3) 2 . . . ?  
O2 Cu1 N3 C11 -31.55(12) . . . 2 ?  
O2 Cu1 N3 C11 148.45(12) 2 . . 2 ?  
N4 Cu1 N3 C11 172.56(11) 1\_655 . . 2 ?  
N1 Cu1 N3 C11 71.52(11) 2 . . 2 ?  
N1 Cu1 N3 C11 -108.48(11) . . . 2 ?  
O2 Cu1 N3 C11 148.45(12) . . . . ?  
O2 Cu1 N3 C11 -31.55(12) 2 . . . ?  
N4 Cu1 N3 C11 -7.44(11) 1\_655 . . . ?  
N1 Cu1 N3 C11 -108.48(11) 2 . . . ?  
N1 Cu1 N3 C11 71.52(11) . . . . ?  
O2 Cu1 O2 C1 82.64(17) 2 . . . ?  
N3 Cu1 O2 C1 -97.36(17) . . . . ?  
N4 Cu1 O2 C1 82.64(17) 1\_655 . . . ?  
N1 Cu1 O2 C1 173.78(18) 2 . . . ?  
N1 Cu1 O2 C1 -9.29(17) . . . . ?  
Cu1 O2 C1 O1 -170.7(2) . . . . ?  
Cu1 O2 C1 C2 11.5(3) . . . . ?  
C6 N1 C2 C3 -3.3(4) . . . . ?  
Cu1 N1 C2 C3 178.5(2) . . . . ?  
C6 N1 C2 C1 176.4(2) . . . . ?

Cu1 N1 C2 C1 -1.9(3) . . . . ?  
 O1 C1 C2 N1 176.5(3) . . . . ?  
 O2 C1 C2 N1 -5.6(3) . . . . ?  
 O1 C1 C2 C3 -3.8(4) . . . . ?  
 O2 C1 C2 C3 174.1(3) . . . . ?  
 N1 C2 C3 N2 3.6(5) . . . . ?  
 C1 C2 C3 N2 -176.0(3) . . . . ?  
 N1 C2 C3 O3 -178.1(3) . . . . ?  
 C1 C2 C3 O3 2.3(4) . . . . ?  
 O3 C3 N2 C5 -179.3(3) . . . . ?  
 C2 C3 N2 C5 -1.0(5) . . . . ?  
 C3 N2 C5 C10 178.1(3) . . . . ?  
 C3 N2 C5 C6 -1.5(5) . . . . ?  
 C2 N1 C6 C7 -177.1(3) . . . . ?  
 Cu1 N1 C6 C7 0.5(4) . . . . ?  
 C2 N1 C6 C5 0.8(4) . . . . ?  
 Cu1 N1 C6 C5 178.34(19) . . . . ?  
 N2 C5 C6 N1 1.7(4) . . . . ?  
 C10 C5 C6 N1 -177.9(3) . . . . ?  
 N2 C5 C6 C7 179.6(3) . . . . ?  
 C10 C5 C6 C7 0.0(4) . . . . ?  
 N1 C6 C7 C8 177.1(3) . . . . ?  
 C5 C6 C7 C8 -0.7(4) . . . . ?  
 C6 C7 C8 C9 0.5(5) . . . . ?  
 C7 C8 C9 C10 0.5(5) . . . . ?  
 C8 C9 C10 C5 -1.2(5) . . . . ?  
 N2 C5 C10 C9 -178.6(3) . . . . ?  
 C6 C5 C10 C9 1.0(4) . . . . ?  
 C11 N3 C11 C12 0.64(17) 2 . . . . ?  
 Cu1 N3 C11 C12 -179.36(17) . . . . ?  
 N3 C11 C12 C13 -1.3(3) . . . . ?  
 C11 C12 C13 C12 0.59(16) . . . . 2 ?  
 C11 C12 C13 C14 -179.41(16) . . . . ?  
 C12 C13 C14 C15 -29.26(18) 2 . . . . 2 ?  
 C12 C13 C14 C15 150.74(18) . . . . 2 ?  
 C12 C13 C14 C15 150.74(18) 2 . . . . ?  
 C12 C13 C14 C15 -29.26(18) . . . . ?  
 C15 C14 C15 C16 -0.39(16) 2 . . . . ?  
 C13 C14 C15 C16 179.61(16) . . . . ?  
 C16 N4 C16 C15 -0.42(18) 2 . . . . ?  
 Cu1 N4 C16 C15 179.58(18) 1\_455 . . . . ?  
 C14 C15 C16 N4 0.8(3) . . . . ?

\_diffn\_reflns\_theta\_full 25.48  
\_diffn\_measured\_fraction\_theta\_full 0.998  
\_refine\_diff\_density\_max 0.250  
\_refine\_diff\_density\_min -0.205  
\_refine\_diff\_density\_rms 0.043

===end

### Complex 3

data\_a

\_audit\_update\_record

;

2012-06-17 # Formatted by publCIF

;

\_audit\_creation\_method SHELXL-97

\_chemical\_name\_systematic

;

?

;

\_chemical\_name\_common ?

\_chemical\_melting\_point ?

\_chemical\_formula\_moiety ?

\_chemical\_formula\_sum

'C18 H16 Cu N2 O7'

\_chemical\_formula\_weight 435.87

loop\_

\_atom\_type\_symbol

\_atom\_type\_description

\_atom\_type\_scatter\_dispersion\_real

\_atom\_type\_scatter\_dispersion\_imag

\_atom\_type\_scatter\_source

'C' 'C' 0.0033 0.0016

'International Tables Vol C Tables 4.2.6.8 and 6.1.1.4'

'H' 'H' 0.0000 0.0000

'International Tables Vol C Tables 4.2.6.8 and 6.1.1.4'

'N' 'N' 0.0061 0.0033

'International Tables Vol C Tables 4.2.6.8 and 6.1.1.4'

'O' 'O' 0.0106 0.0060

'International Tables Vol C Tables 4.2.6.8 and 6.1.1.4'

'Cu' 'Cu' 0.3201 1.2651

'International Tables Vol C Tables 4.2.6.8 and 6.1.1.4'

\_symmetry\_cell\_setting Orthorhombic  
\_symmetry\_space\_group\_name\_H-M Pbcn

loop\_

\_symmetry\_equiv\_pos\_as\_xyz

'x, y, z'

'-x+1/2, -y+1/2, z+1/2'

'-x, y, -z+1/2'

'x+1/2, -y+1/2, -z'

'-x, -y, -z'

'x-1/2, y-1/2, -z-1/2'

'x, -y, z-1/2'

'-x-1/2, y-1/2, z'

\_cell\_length\_a 20.5311(16)  
\_cell\_length\_b 11.1914(8)  
\_cell\_length\_c 15.4446(12)  
\_cell\_angle\_alpha 90.00  
\_cell\_angle\_beta 90.00  
\_cell\_angle\_gamma 90.00  
\_cell\_volume 3548.7(5)  
\_cell\_formula\_units\_Z 8  
\_cell\_measurement\_temperature 296(2)  
\_cell\_measurement\_reflns\_used 4038  
\_cell\_measurement\_theta\_min 2.9691  
\_cell\_measurement\_theta\_max 26.3079

\_exptl\_crystal\_description block  
\_exptl\_crystal\_colour blue  
\_exptl\_crystal\_size\_max 0.23  
\_exptl\_crystal\_size\_mid 0.22  
\_exptl\_crystal\_size\_min 0.18  
\_exptl\_crystal\_density\_meas ?  
\_exptl\_crystal\_density\_diffn 1.632  
\_exptl\_crystal\_density\_method 'not measured'  
\_exptl\_crystal\_F\_000 1784

\_exptl\_absorpt\_coefficient\_mu 1.277  
\_exptl\_absorpt\_correction\_type multi-scan  
\_exptl\_absorpt\_correction\_T\_min 0.7578  
\_exptl\_absorpt\_correction\_T\_max 0.8027  
\_exptl\_absorpt\_process\_details sadabs

\_exptl\_special\_details

;  
?  
;

\_diffn\_ambient\_temperature 296(2)  
\_diffn\_radiation\_wavelength 0.71073  
\_diffn\_radiation\_type MoK\alpha  
\_diffn\_radiation\_source 'fine-focus sealed tube'  
\_diffn\_radiation\_monochromator graphite  
\_diffn\_measurement\_device\_type 'multiwire proportional'  
\_diffn\_measurement\_method 'phi and omega scans'  
\_diffn\_detector\_area\_resol\_mean ?  
\_diffn\_standards\_number 0  
\_diffn\_standards\_interval\_count ?  
\_diffn\_standards\_interval\_time ?  
\_diffn\_standards\_decay\_% ?  
\_diffn\_reflns\_number 12223  
\_diffn\_reflns\_av\_R\_equivalents 0.0683  
\_diffn\_reflns\_av\_sigmaI/netI 0.0860  
\_diffn\_reflns\_limit\_h\_min -24  
\_diffn\_reflns\_limit\_h\_max 22  
\_diffn\_reflns\_limit\_k\_min -8  
\_diffn\_reflns\_limit\_k\_max 13  
\_diffn\_reflns\_limit\_l\_min -18  
\_diffn\_reflns\_limit\_l\_max 12  
\_diffn\_reflns\_theta\_min 3.00  
\_diffn\_reflns\_theta\_max 25.49  
\_reflns\_number\_total 3296  
\_reflns\_number\_gt 2231  
\_reflns\_threshold\_expression >2sigma(I)

\_computing\_data\_collection 'Bruker FRAMBO'  
\_computing\_cell\_refinement 'Bruker FRAMBO'  
\_computing\_data\_reduction 'Bruker SAINT'

```

_computing_structure_solution      'SHELXS-97 (Sheldrick, 1990)'
_computing_structure_refinement    'SHELXL-97 (Sheldrick, 1997)'
_computing_molecular_graphics      'Bruker SHELXTL'
_computing_publication_material    'Bruker SHELXTL'

```

```
_refine_special_details
```

```
;
```

Refinement of  $F^2$  against ALL reflections. The weighted R-factor  $wR$  and goodness of fit  $S$  are based on  $F^2$ , conventional R-factors  $R$  are based on  $F$ , with  $F$  set to zero for negative  $F^2$ . The threshold expression of  $F^2 > 2\text{sigma}(F^2)$  is used only for calculating R-factors(gt) etc. and is not relevant to the choice of reflections for refinement. R-factors based on  $F^2$  are statistically about twice as large as those based on  $F$ , and R-factors based on ALL data will be even larger.

```
;
```

```

_refine_ls_structure_factor_coef  Fsqd
_refine_ls_matrix_type            full
_refine_ls_weighting_scheme       calc
_refine_ls_weighting_details
'calc w=1/[\s^2(Fo^2)+(0.0265P)^2+0.0000P] where P=(Fo^2+2Fc^2)/3'
_atom_sites_solution_primary      direct
_atom_sites_solution_secondary    difmap
_atom_sites_solution_hydrogens    geom
_refine_ls_hydrogen_treatment     constr
_refine_ls_extinction_method      none
_refine_ls_extinction_coef        ?
_refine_ls_number_reflns          3296
_refine_ls_number_parameters       263
_refine_ls_number_restraints      0
_refine_ls_R_factor_all            0.0768
_refine_ls_R_factor_gt            0.0417
_refine_ls_wR_factor_ref           0.1011
_refine_ls_wR_factor_gt           0.0811
_refine_ls_goodness_of_fit_ref     1.024
_refine_ls_restrained_S_all        1.024
_refine_ls_shift/su_max            0.000
_refine_ls_shift/su_mean           0.000

```

```
loop_
```

```
_atom_site_label
```



\_atom\_site\_type\_symbol  
 \_atom\_site\_fract\_x  
 \_atom\_site\_fract\_y  
 \_atom\_site\_fract\_z  
 \_atom\_site\_U\_iso\_or\_equiv  
 \_atom\_site\_adp\_type  
 \_atom\_site\_occupancy  
 \_atom\_site\_symmetry\_multiplicity  
 \_atom\_site\_calc\_flag  
 \_atom\_site\_refinement\_flags  
 \_atom\_site\_disorder\_assembly  
 \_atom\_site\_disorder\_group

Cu1 Cu 0.492287(19) 0.25634(4) 0.14925(3) 0.02378(16) Uani 1 1 d . . .  
 O1 O 0.54705(11) 0.3979(2) 0.16599(15) 0.0274(6) Uani 1 1 d . A .  
 O2 O 0.58210(10) 0.3342(2) 0.29581(16) 0.0284(6) Uani 1 1 d . . .  
 O3 O 0.63728(12) 0.4813(3) 0.44763(17) 0.0409(7) Uani 1 1 d . . .  
 O4 O 0.70896(12) 0.3580(3) 0.38714(19) 0.0438(8) Uani 1 1 d . . .  
 O6 O 0.45099(11) 0.3000(2) 0.02271(16) 0.0349(7) Uani 1 1 d . . .  
 H1W H 0.4790 0.3376 -0.0073 0.052 Uiso 1 1 d R . .  
 H2W H 0.4185 0.3467 0.0188 0.052 Uiso 1 1 d R . .  
 O7 O 0.52683(12) 0.6010(2) 0.40107(18) 0.0481(8) Uani 1 1 d . . .  
 H3W H 0.5667 0.5900 0.4133 0.072 Uiso 1 1 d R . .  
 H4W H 0.5083 0.5403 0.3790 0.072 Uiso 1 1 d R . .  
 N1 N 0.56524(13) 0.1620(3) 0.09839(19) 0.0306(8) Uani 1 1 d . . .  
 N2 N 0.45355(13) 0.0939(3) 0.16070(19) 0.0271(8) Uani 1 1 d . . .  
 C1 C 0.63468(15) 0.5001(3) 0.2320(2) 0.0228(9) Uani 1 1 d . A .  
 C2 C 0.67338(15) 0.5236(3) 0.3051(2) 0.0218(8) Uani 1 1 d . . .  
 C3 C 0.71593(16) 0.6200(3) 0.3038(2) 0.0291(9) Uani 1 1 d . A .  
 H3 H 0.7404 0.6376 0.3529 0.035 Uiso 1 1 calc R . .  
 C4 C 0.72248(17) 0.6902(4) 0.2306(3) 0.0331(10) Uani 1 1 d . . .  
 H4 H 0.7516 0.7573 0.2306 0.040 Uiso 0.120(6) 1 d PR A 2  
 O5' O 0.6969(10) 0.727(2) 0.0745(17) 0.047(8) Uani 0.120(6) 1 d PA 2  
 H5' H 0.6700 0.7035 0.0365 0.070 Uiso 0.120(6) 1 d PR A 2  
 C5 C 0.68656(18) 0.6637(4) 0.1569(3) 0.0350(10) Uani 1 1 d . A .  
 H5A H 0.6923 0.7104 0.1053 0.042 Uiso 0.880(6) 1 d PR A 1  
 O5 O 0.76265(14) 0.7858(3) 0.2296(2) 0.0464(11) Uani 0.880(6) 1 d PA 1  
 H5 H 0.7721 0.8053 0.2813 0.070 Uiso 0.880(6) 1 d PR A 1  
 C6 C 0.64329(17) 0.5712(4) 0.1578(2) 0.0314(10) Uani 1 1 d . . .  
 H6A H 0.6190 0.5548 0.1084 0.038 Uiso 1 1 calc R A .  
 C7 C 0.58494(16) 0.4046(3) 0.2316(2) 0.0245(9) Uani 1 1 d . . .  
 C8 C 0.67261(17) 0.4467(4) 0.3860(2) 0.0302(9) Uani 1 1 d . . .  
 C9 C 0.61996(18) 0.2064(4) 0.0649(3) 0.0438(12) Uani 1 1 d . . .  
 H9 H 0.6266 0.2885 0.0665 0.053 Uiso 1 1 calc R . .  
 C10 C 0.6671(2) 0.1347(5) 0.0281(3) 0.0564(14) Uani 1 1 d . . .

H10 H 0.7048 0.1675 0.0048 0.068 Uiso 1 1 calc R . .  
C11 C 0.6569(2) 0.0141(5) 0.0270(3) 0.0602(15) Uani 1 1 d . . .  
H11 H 0.6884 -0.0362 0.0036 0.072 Uiso 1 1 calc R . .  
C12 C 0.6007(2) -0.0333(4) 0.0599(3) 0.0471(12) Uani 1 1 d . . .  
H12 H 0.5933 -0.1153 0.0583 0.057 Uiso 1 1 calc R . .  
C13 C 0.55488(17) 0.0429(4) 0.0956(2) 0.0287(9) Uani 1 1 d . . .  
C14 C 0.49222(17) 0.0034(4) 0.1333(2) 0.0295(9) Uani 1 1 d . . .  
C15 C 0.4729(2) -0.1131(4) 0.1401(3) 0.0409(11) Uani 1 1 d . . .  
H15 H 0.5000 -0.1742 0.1209 0.049 Uiso 1 1 calc R . .  
C16 C 0.4132(2) -0.1396(4) 0.1754(3) 0.0513(13) Uani 1 1 d . . .  
H16 H 0.3999 -0.2186 0.1811 0.062 Uiso 1 1 calc R . .  
C17 C 0.3733(2) -0.0483(4) 0.2024(3) 0.0453(12) Uani 1 1 d . . .  
H17 H 0.3325 -0.0645 0.2258 0.054 Uiso 1 1 calc R . .  
C18 C 0.39504(17) 0.0678(4) 0.1941(3) 0.0343(10) Uani 1 1 d . . .  
H18 H 0.3682 0.1299 0.2122 0.041 Uiso 1 1 calc R . .

loop\_

\_atom\_site\_aniso\_label

\_atom\_site\_aniso\_U\_11

\_atom\_site\_aniso\_U\_22

\_atom\_site\_aniso\_U\_33

\_atom\_site\_aniso\_U\_23

\_atom\_site\_aniso\_U\_13

\_atom\_site\_aniso\_U\_12

Cu1 0.0239(3) 0.0233(3) 0.0241(3) -0.0043(2) 0.00061(18) -0.0022(2)  
O1 0.0309(14) 0.0264(17) 0.0248(15) 0.0007(12) -0.0056(10) -0.0060(12)  
O2 0.0239(14) 0.0307(17) 0.0305(16) 0.0057(13) -0.0029(11) -0.0024(12)  
O3 0.0514(18) 0.047(2) 0.0238(16) -0.0039(14) 0.0056(12) -0.0033(14)  
O4 0.0373(17) 0.046(2) 0.049(2) 0.0129(16) -0.0056(13) 0.0108(15)  
O6 0.0368(15) 0.0394(18) 0.0285(15) 0.0017(13) -0.0004(11) 0.0025(13)  
O7 0.0454(17) 0.034(2) 0.065(2) -0.0129(16) 0.0074(15) -0.0001(14)  
N1 0.0267(17) 0.037(2) 0.0282(19) -0.0037(16) 0.0039(14) -0.0011(16)  
N2 0.0247(17) 0.029(2) 0.0271(19) -0.0023(15) -0.0023(13) -0.0004(15)  
C1 0.0195(18) 0.021(2) 0.028(2) -0.0026(17) 0.0032(14) -0.0010(16)  
C2 0.0173(18) 0.021(2) 0.028(2) -0.0007(17) 0.0002(14) 0.0008(16)  
C3 0.025(2) 0.033(3) 0.028(2) -0.0057(19) -0.0020(15) -0.0017(18)  
C4 0.022(2) 0.031(3) 0.046(3) -0.002(2) 0.0029(17) -0.0060(19)  
O5' 0.042(14) 0.028(16) 0.07(2) 0.010(13) 0.005(12) -0.009(11)  
C5 0.039(2) 0.033(3) 0.033(2) 0.011(2) 0.0015(17) -0.009(2)  
O5 0.045(2) 0.044(2) 0.050(2) 0.0034(17) -0.0002(15) -0.0270(17)  
C6 0.030(2) 0.038(3) 0.026(2) 0.0023(19) -0.0022(15) -0.005(2)  
C7 0.0208(19) 0.028(2) 0.025(2) -0.0005(18) -0.0001(15) 0.0060(17)  
C8 0.024(2) 0.037(3) 0.030(2) -0.005(2) -0.0079(17) -0.0066(19)

C9 0.037(2) 0.056(3) 0.038(3) -0.013(2) 0.007(2) -0.009(2)  
C10 0.031(3) 0.083(4) 0.055(3) -0.017(3) 0.011(2) -0.002(3)  
C11 0.047(3) 0.071(4) 0.062(3) -0.019(3) 0.010(2) 0.021(3)  
C12 0.049(3) 0.045(3) 0.047(3) -0.010(2) 0.005(2) 0.014(2)  
C13 0.031(2) 0.028(3) 0.027(2) -0.0053(19) -0.0070(16) 0.0025(19)  
C14 0.034(2) 0.025(3) 0.029(2) -0.0043(18) -0.0046(16) 0.0012(19)  
C15 0.047(3) 0.021(3) 0.055(3) -0.008(2) -0.002(2) 0.003(2)  
C16 0.064(3) 0.027(3) 0.063(3) -0.001(2) -0.002(3) -0.013(2)  
C17 0.040(3) 0.037(3) 0.059(3) 0.000(2) -0.002(2) -0.011(2)  
C18 0.029(2) 0.033(3) 0.040(3) -0.004(2) 0.0035(17) -0.0021(19)

\_geom\_special\_details

;

All esds (except the esd in the dihedral angle between two l.s. planes) are estimated using the full covariance matrix. The cell esds are taken into account individually in the estimation of esds in distances, angles and torsion angles; correlations between esds in cell parameters are only used when they are defined by crystal symmetry. An approximate (isotropic) treatment of cell esds is used for estimating esds involving l.s. planes.

;

loop\_

\_geom\_bond\_atom\_site\_label\_1

\_geom\_bond\_atom\_site\_label\_2

\_geom\_bond\_distance

\_geom\_bond\_site\_symmetry\_2

\_geom\_bond\_publ\_flag

Cu1 O2 1.952(2) 3\_655 ?

Cu1 O1 1.960(2) . ?

Cu1 N2 1.992(3) . ?

Cu1 N1 1.994(3) . ?

Cu1 O6 2.186(2) . ?

O1 C7 1.280(4) . ?

O2 C7 1.268(4) . ?

O2 Cu1 1.952(2) 3\_655 ?

O3 C8 1.259(4) . ?

O4 C8 1.242(4) . ?

O6 H1W 0.8500 . ?

O6 H2W 0.8501 . ?

O7 H3W 0.8500 . ?

O7 H4W 0.8500 . ?

N1 C9 1.333(4) . ?

N1 C13 1.351(5) . ?  
N2 C18 1.340(4) . ?  
N2 C14 1.355(4) . ?  
C1 C2 1.405(5) . ?  
C1 C6 1.407(5) . ?  
C1 C7 1.478(5) . ?  
C2 C3 1.388(5) . ?  
C2 C8 1.517(5) . ?  
C3 C4 1.384(5) . ?  
C3 H3 0.9300 . ?  
C4 O5 1.350(5) . ?  
C4 C5 1.389(5) . ?  
C4 H4 0.9600 . ?  
O5' C5 1.47(2) . ?  
O5' H5' 0.8500 . ?  
O5' H5A 0.5208 . ?  
C5 C6 1.364(5) . ?  
C5 H5A 0.9599 . ?  
O5 H4 0.3911 . ?  
O5 H5 0.8501 . ?  
C6 H6A 0.9300 . ?  
C9 C10 1.380(5) . ?  
C9 H9 0.9300 . ?  
C10 C11 1.366(6) . ?  
C10 H10 0.9300 . ?  
C11 C12 1.369(6) . ?  
C11 H11 0.9300 . ?  
C12 C13 1.383(5) . ?  
C12 H12 0.9300 . ?  
C13 C14 1.480(5) . ?  
C14 C15 1.367(5) . ?  
C15 C16 1.373(5) . ?  
C15 H15 0.9300 . ?  
C16 C17 1.373(6) . ?  
C16 H16 0.9300 . ?  
C17 C18 1.380(5) . ?  
C17 H17 0.9300 . ?  
C18 H18 0.9300 . ?

loop\_

  \_geom\_angle\_atom\_site\_label\_1

  \_geom\_angle\_atom\_site\_label\_2

  \_geom\_angle\_atom\_site\_label\_3

\_geom\_angle  
\_geom\_angle\_site\_symmetry\_1  
\_geom\_angle\_site\_symmetry\_3  
\_geom\_angle\_publ\_flag  
O2 Cu1 O1 91.75(10) 3\_655 . ?  
O2 Cu1 N2 93.23(11) 3\_655 . ?  
O1 Cu1 N2 162.76(11) . . ?  
O2 Cu1 N1 174.41(12) 3\_655 . ?  
O1 Cu1 N1 92.81(11) . . ?  
N2 Cu1 N1 81.48(13) . . ?  
O2 Cu1 O6 89.15(10) 3\_655 . ?  
O1 Cu1 O6 99.18(10) . . ?  
N2 Cu1 O6 97.39(11) . . ?  
N1 Cu1 O6 93.30(11) . . ?  
C7 O1 Cu1 120.0(2) . . ?  
C7 O2 Cu1 130.8(2) . 3\_655 ?  
Cu1 O6 H1W 109.6 . . ?  
Cu1 O6 H2W 120.4 . . ?  
H1W O6 H2W 100.9 . . ?  
H3W O7 H4W 113.9 . . ?  
C9 N1 C13 119.2(3) . . ?  
C9 N1 Cu1 126.1(3) . . ?  
C13 N1 Cu1 114.6(2) . . ?  
C18 N2 C14 118.8(3) . . ?  
C18 N2 Cu1 126.3(3) . . ?  
C14 N2 Cu1 114.9(2) . . ?  
C2 C1 C6 118.6(3) . . ?  
C2 C1 C7 121.9(3) . . ?  
C6 C1 C7 119.5(3) . . ?  
C3 C2 C1 119.3(3) . . ?  
C3 C2 C8 117.4(3) . . ?  
C1 C2 C8 123.3(3) . . ?  
C4 C3 C2 121.0(3) . . ?  
C4 C3 H3 119.5 . . ?  
C2 C3 H3 119.5 . . ?  
O5 C4 C3 121.2(4) . . ?  
O5 C4 C5 119.0(4) . . ?  
C3 C4 C5 119.8(4) . . ?  
O5 C4 H4 1.2 . . ?  
C3 C4 H4 120.3 . . ?  
C5 C4 H4 119.9 . . ?  
C5 O5' H5' 110.5 . . ?  
C5 O5' H5A 7.6 . . ?  
H5' O5' H5A 113.5 . . ?

C6 C5 C4 120.0(4) . . ?  
C6 C5 O5' 118.0(10) . . ?  
C4 C5 O5' 121.9(10) . . ?  
C6 C5 H5A 120.2 . . ?  
C4 C5 H5A 119.9 . . ?  
O5' C5 H5A 4.1 . . ?  
C4 O5 H4 2.8 . . ?  
C4 O5 H5 109.4 . . ?  
H4 O5 H5 107.6 . . ?  
C5 C6 C1 121.3(3) . . ?  
C5 C6 H6A 119.4 . . ?  
C1 C6 H6A 119.3 . . ?  
O2 C7 O1 123.7(3) . . ?  
O2 C7 C1 118.6(3) . . ?  
O1 C7 C1 117.8(3) . . ?  
O4 C8 O3 125.6(4) . . ?  
O4 C8 C2 117.4(3) . . ?  
O3 C8 C2 117.0(4) . . ?  
N1 C9 C10 122.3(5) . . ?  
N1 C9 H9 118.8 . . ?  
C10 C9 H9 118.8 . . ?  
C11 C10 C9 118.2(4) . . ?  
C11 C10 H10 120.9 . . ?  
C9 C10 H10 120.9 . . ?  
C10 C11 C12 120.5(4) . . ?  
C10 C11 H11 119.7 . . ?  
C12 C11 H11 119.7 . . ?  
C11 C12 C13 118.8(4) . . ?  
C11 C12 H12 120.6 . . ?  
C13 C12 H12 120.6 . . ?  
N1 C13 C12 120.9(4) . . ?  
N1 C13 C14 114.8(3) . . ?  
C12 C13 C14 124.3(4) . . ?  
N2 C14 C15 121.3(4) . . ?  
N2 C14 C13 114.1(3) . . ?  
C15 C14 C13 124.6(4) . . ?  
C14 C15 C16 119.7(4) . . ?  
C14 C15 H15 120.2 . . ?  
C16 C15 H15 120.2 . . ?  
C15 C16 C17 119.5(4) . . ?  
C15 C16 H16 120.3 . . ?  
C17 C16 H16 120.3 . . ?  
C16 C17 C18 118.7(4) . . ?  
C16 C17 H17 120.7 . . ?

C18 C17 H17 120.7 . . ?  
N2 C18 C17 122.1(4) . . ?  
N2 C18 H18 119.0 . . ?  
C17 C18 H18 119.0 . . ?

loop\_

\_geom\_torsion\_atom\_site\_label\_1  
\_geom\_torsion\_atom\_site\_label\_2  
\_geom\_torsion\_atom\_site\_label\_3  
\_geom\_torsion\_atom\_site\_label\_4  
\_geom\_torsion  
\_geom\_torsion\_site\_symmetry\_1  
\_geom\_torsion\_site\_symmetry\_2  
\_geom\_torsion\_site\_symmetry\_3  
\_geom\_torsion\_site\_symmetry\_4  
\_geom\_torsion\_publ\_flag  
O2 Cu1 O1 C7 96.0(3) 3\_655 . . . ?  
N2 Cu1 O1 C7 -10.8(5) . . . . ?  
N1 Cu1 O1 C7 -80.8(3) . . . . ?  
O6 Cu1 O1 C7 -174.6(2) . . . . ?  
O2 Cu1 N1 C9 -163.8(10) 3\_655 . . . ?  
O1 Cu1 N1 C9 -19.1(3) . . . . ?  
N2 Cu1 N1 C9 177.2(3) . . . . ?  
O6 Cu1 N1 C9 80.2(3) . . . . ?  
O2 Cu1 N1 C13 19.2(13) 3\_655 . . . ?  
O1 Cu1 N1 C13 163.8(3) . . . . ?  
N2 Cu1 N1 C13 0.2(3) . . . . ?  
O6 Cu1 N1 C13 -96.8(3) . . . . ?  
O2 Cu1 N2 C18 1.8(3) 3\_655 . . . ?  
O1 Cu1 N2 C18 108.4(4) . . . . ?  
N1 Cu1 N2 C18 180.0(3) . . . . ?  
O6 Cu1 N2 C18 -87.8(3) . . . . ?  
O2 Cu1 N2 C14 -176.5(3) 3\_655 . . . ?  
O1 Cu1 N2 C14 -70.0(5) . . . . ?  
N1 Cu1 N2 C14 1.7(3) . . . . ?  
O6 Cu1 N2 C14 93.9(3) . . . . ?  
C6 C1 C2 C3 3.8(5) . . . . ?  
C7 C1 C2 C3 -175.3(3) . . . . ?  
C6 C1 C2 C8 -174.6(3) . . . . ?  
C7 C1 C2 C8 6.3(5) . . . . ?  
C1 C2 C3 C4 -2.4(5) . . . . ?  
C8 C2 C3 C4 176.1(3) . . . . ?  
C2 C3 C4 O5 178.4(3) . . . . ?

C2 C3 C4 C5 -0.6(6) . . . . ?  
O5 C4 C5 C6 -176.8(4) . . . . ?  
C3 C4 C5 C6 2.3(6) . . . . ?  
O5 C4 C5 O5' 7.6(12) . . . . ?  
C3 C4 C5 O5' -173.3(11) . . . . ?  
C4 C5 C6 C1 -0.9(6) . . . . ?  
O5' C5 C6 C1 174.9(10) . . . . ?  
C2 C1 C6 C5 -2.1(6) . . . . ?  
C7 C1 C6 C5 177.0(3) . . . . ?  
Cu1 O2 C7 O1 -34.4(5) 3\_655 . . . . ?  
Cu1 O2 C7 C1 145.7(3) 3\_655 . . . . ?  
Cu1 O1 C7 O2 -12.4(5) . . . . ?  
Cu1 O1 C7 C1 167.6(2) . . . . ?  
C2 C1 C7 O2 -7.6(5) . . . . ?  
C6 C1 C7 O2 173.3(3) . . . . ?  
C2 C1 C7 O1 172.5(3) . . . . ?  
C6 C1 C7 O1 -6.6(5) . . . . ?  
C3 C2 C8 O4 -92.3(4) . . . . ?  
C1 C2 C8 O4 86.1(4) . . . . ?  
C3 C2 C8 O3 84.6(4) . . . . ?  
C1 C2 C8 O3 -97.0(4) . . . . ?  
C13 N1 C9 C10 -0.7(6) . . . . ?  
Cu1 N1 C9 C10 -177.6(3) . . . . ?  
N1 C9 C10 C11 -0.5(7) . . . . ?  
C9 C10 C11 C12 1.4(7) . . . . ?  
C10 C11 C12 C13 -1.0(7) . . . . ?  
C9 N1 C13 C12 1.1(6) . . . . ?  
Cu1 N1 C13 C12 178.3(3) . . . . ?  
C9 N1 C13 C14 -179.1(3) . . . . ?  
Cu1 N1 C13 C14 -1.8(4) . . . . ?  
C11 C12 C13 N1 -0.2(6) . . . . ?  
C11 C12 C13 C14 180.0(4) . . . . ?  
C18 N2 C14 C15 -0.8(5) . . . . ?  
Cu1 N2 C14 C15 177.7(3) . . . . ?  
C18 N2 C14 C13 178.5(3) . . . . ?  
Cu1 N2 C14 C13 -3.0(4) . . . . ?  
N1 C13 C14 N2 3.2(5) . . . . ?  
C12 C13 C14 N2 -176.9(4) . . . . ?  
N1 C13 C14 C15 -177.5(4) . . . . ?  
C12 C13 C14 C15 2.3(6) . . . . ?  
N2 C14 C15 C16 -0.1(6) . . . . ?  
C13 C14 C15 C16 -179.3(4) . . . . ?  
C14 C15 C16 C17 0.9(7) . . . . ?  
C15 C16 C17 C18 -0.8(7) . . . . ?



C14 N2 C18 C17 0.8(6) . . . . ?  
Cu1 N2 C18 C17 -177.4(3) . . . . ?  
C16 C17 C18 N2 0.0(6) . . . . ?

loop\_

\_geom\_hbond\_atom\_site\_label\_D  
\_geom\_hbond\_atom\_site\_label\_H  
\_geom\_hbond\_atom\_site\_label\_A  
\_geom\_hbond\_distance\_DH  
\_geom\_hbond\_distance\_HA  
\_geom\_hbond\_distance\_DA  
\_geom\_hbond\_angle\_DHA  
\_geom\_hbond\_site\_symmetry\_A  
O6 H1W O7 0.85 1.85 2.680(4) 163.3 7\_565  
O6 H2W O3 0.85 1.96 2.759(4) 155.7 3\_655  
O7 H3W O3 0.85 1.96 2.730(4) 149.4 .  
O7 H4W O1 0.85 2.08 2.922(4) 173.0 3\_655  
O5' H5' O4 0.85 2.54 3.06(3) 120.6 7\_565  
O5' H5' O3 0.85 2.57 3.29(3) 142.5 7\_565  
O5' H5' O6 0.85 2.65 3.40(2) 148.5 5\_665  
O5 H5 O4 0.85 1.78 2.630(4) 175.5 8\_765

\_diffn\_measured\_fraction\_theta\_max 0.998  
\_diffn\_reflns\_theta\_full 25.49  
\_diffn\_measured\_fraction\_theta\_full 0.998  
\_refine\_diff\_density\_max 0.627  
\_refine\_diff\_density\_min -0.903  
\_refine\_diff\_density\_rms 0.102  
===end
